# Supplementary material
Source: Springer Nature journal article supplement (https://www.springermedizin.de/resource/supplementary/13044_2010_21_MOESM2_ESM.pdf/9659968)

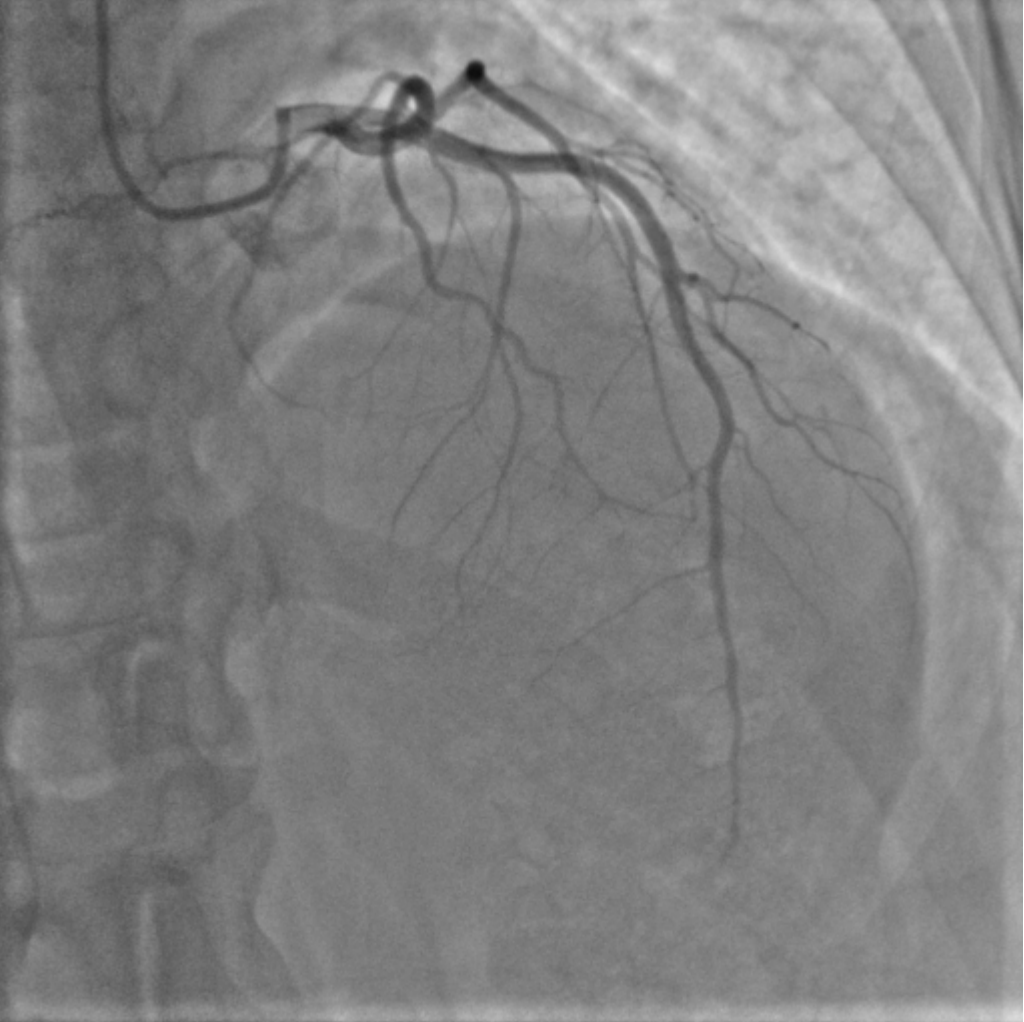

Supplement: MOESM2 [file 9659968]
